# Supplementary material
Source: Springer Nature journal article supplement (https://www.springermedizin.de/resource/supplementary/13046_2008_106_MOESM4_ESM.pdf/9661638)

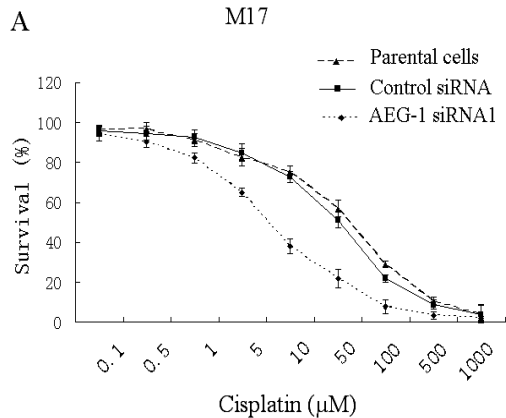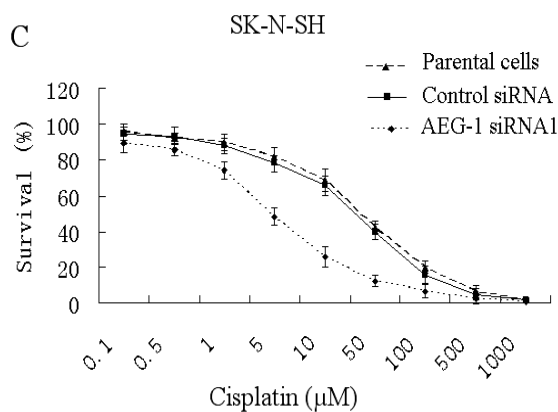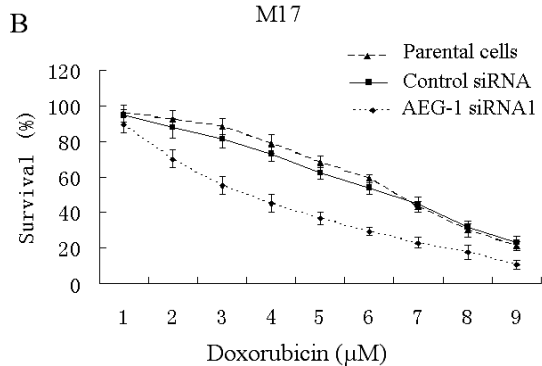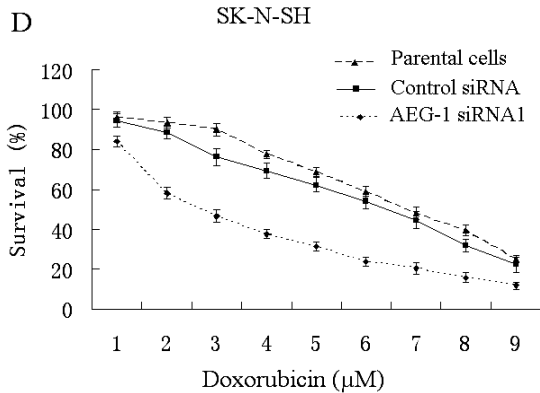

Supplement: MOESM4 [file 9661638]
